# Supplementary material for: High-throughput mapping of protein occupancy identifies functional elements without the restriction of a candidate factor approach
Source: PubMed Central journal article supplement — Nucleic Acids Res. 2010 Dec 17;39(6):e33. doi: 10.1093/nar/gkq1213 (PMC3064794; doi:10.1093/nar/gkq1213), 2010-12-17
Supplement: supp_gkq1213_TableS1temp.pdf [file supp_gkq1213_TableS1temp.pdf]

Table S1

**Highly Enriched Factors -- Differentiated State**

|        |        |         |
|--------|--------|---------|
| TBP    | TCF7   | HOXB5   |
| ZFP128 | POU3F2 | HOXB13  |
| DBX1   | IRX3   | ALX3    |
| TLX2   | DLX3   | HOXB7   |
| SOX21  | HNF1B  | PLAGL1  |
| SOX14  | LMX1A  | SOX30   |
| POU1F1 | HOXB4  | HNF1A   |
| SOX13  | HOXD10 | MSX3    |
| GLIS2  | CUX1   | HOXA7   |
| POU3F4 | FOKK1  | SOX12   |
| HOXC6  | HOXC5  | FOXJ3   |
| POU3F1 | OTP    | HLTF    |
| FOXL1  | LMX1B  | ESX1    |
| DBX2   | BARHL2 | EN2     |
| HOXD8  | HOXA6  | ARID5A  |
| SOX8   | IRX3   | RHOX6   |
| FOXL1  | ZFP105 | PROP1   |
| FOXA2  | HLX    | HOXA2   |
| SOX18  | SOX7   | UNCX    |
| HOXA4  | NKX6-1 | PRRX1   |
| SOX5   | SRF    | GSX2    |
| POU4F3 | PHOX2B | ELF3    |
| HOXC8  | VSX1   | BARX1   |
| IRX6   | LHX5   | POU3F3  |
| NKX6-3 | HOXD1  | HOXA1   |
| SOX17  | HOXA5  | ARID3A  |
| IRX5   | FOXJ1  | BARHL1  |
| SOX1   | HOXB8  | TCFAP2E |
| MTF1   | NKX6-1 | LHX4    |
| ARID5A | HOXD3  | HMBOX1  |
| HOXC4  | ZFP187 | NFIL3   |
| SRY    | PAX7   | GATA3   |
| BARX2  | DLX2   |         |
| LHX3   | MSX1   |         |
| LHX1   | SOX1   |         |

**GO Terms -- Differentiated State**

NERVOUS\_SYSTEM\_DEVELOPMENT  
 CENTRAL\_NERVOUS\_SYSTEM\_DEVELOPMENT  
 SENSORY\_PERCEPTION  
 NEUROLOGICAL\_SYSTEM\_PROCESS  
 REGULATION\_OF\_CELL\_PROLIFERATION  
 SYSTEM\_PROCESS  
 CELL\_PROLIFERATION\_GO\_0008283  
 CELL\_DEVELOPMENT  
 NEGATIVE\_REGULATION\_OF\_CELLULAR\_PROCESS  
 NEGATIVE\_REGULATION\_OF\_BIOLOGICAL\_PROCESS  
 NUCLEUS

Table S1

**Highly Enriched Factors -- Undifferentiated State**

TBP HOXC4  
 DBX1 LHX1  
 ZFP128 IRX3  
 TLX2 ZIC1  
 SOX21 NKX6-1  
 SRF PHOX2B  
 GLIS2 SOX5  
 ZFP105 BARHL2  
 SOX14 CUX1  
 ELF3 PLAGL1  
 MTF1 OTP  
 POU1F1 POU3F3  
 PLAGL1 SOX18  
 POU3F4 IRX3  
 TCFAP2E ZFP423  
 POU3F1 LHX5  
 FOXL1 VSX1  
 SOX13 SOX1  
 HOXC6 HOXA9  
 NKX6-3 PRRX1  
 FOXA2 GLIS2  
 POU4F3 LHX4  
 IRX6  
 LHX3  
 DBX2  
 ARID5A  
 IRX5  
 HOXA4  
 POU3F2  
 FOXK1  
 SOX8  
 BARX2  
 TCF7  
 SOX1  
 HOXB8

**Go Terms -- Undifferentiated State**

NERVOUS\_SYSTEM\_DEVELOPMENT  
 SENSORY\_PERCEPTION  
 TRANSCRIPTION\_COACTIVATOR\_ACTIVITY  
 NEUROLOGICAL\_SYSTEM\_PROCESS  
 REGULATION\_OF\_CELL\_PROLIFERATION  
 IDENTICAL\_PROTEIN\_BINDING  
 SYSTEM\_PROCESS  
 CELL\_PROLIFERATION\_GO\_0008283  
 NEGATIVE\_REGULATION\_OF\_CELLULAR\_PROCESS  
 POSITIVE\_REGULATION\_OF\_CELLULAR\_PROCESS  
 NEGATIVE\_REGULATION\_OF\_BIOLOGICAL\_PROCESS  
 POSITIVE\_REGULATION\_OF\_BIOLOGICAL\_PROCESS  
 NUCLEUS
